# Supplementary material
Source: publisher site journal article supplement (https://www.dovepress.com/article/295494)

**Cost of Biopsy and Complications in Patients with Lung Cancer**

**SUPPLEMENTARY MATERIAL**

**Coding**

Lung cancer diagnosis coding for patient selection

| ICD-9 | 162.0, 162.2, 162.3, 162.4, 162.5, 162.8, 162.9 |
| --- | --- |
| ICD-10 | C33, C34.00, C34.01, C34.02, C34.10, C34.11, C34.12, C34.2, C34.30, C34.31, C34.32, C34.80, C34.81, C34.82, C34.90, C34.91, C34.92 |

Cross walk created to capture ICD-9 and ICD-10 procedures for inpatient stays

Treatment:

| 77013, 77022, 76940, 31640, 31641, 32663, 32666, 32667, 32670, 32671, 32668, 32480, 32482, 32484, 32486, 32505, 32506, 31643, 77401-77409, 77411-77414, 77416, G6003-G6014, 77385, 77386, G6015, G6016, 77387, 76950, 77421, 0197T, G6001, G6002, G6017, 77014, 77520, 77522, 77523, 77525, 77422, 77423, 77371, 77372, 77373, 77600, 77605, 77610, 77615, 77620, 77767, 77768, 77778, 77770, 77771, 77772, 0394T, 0395T, 77424, 77425, 77750, 77761, 77762, 77763, 77790, 96413, 96415, 96417, 96409, 96411 |
| --- |

CT Scan:

| 71250, 71260, 71270 |
| --- |

Biopsy Procedure:

| Percutaneous | 32400, 32405, 32554, 32555, 32556, 32557, 10021, 10022 |
| --- | --- |
| Surgical | 32096, 32097, 32098, 32100, 32484, 32505,32507, 32601, 32606, 32607, 32608, 32609, 32666, 32667, 32668 |
| Bronchoscopy | 31620, 31622, 31623, 31624, 31625, 31626, 31627, 31628, 31629, 31632, 31633, 31652, 31653, 31654 |
| Mediastinoscopy | 39400, 39401, 39402 |

ICD-9/ICD-10 and CPT Codes used to Identified Post-Procedural Complication and Treatment

| Complication types | ICD9CM | ICD10CM | CPT | ICD9 Procedure | ICD10 Procedure |
| --- | --- | --- | --- | --- | --- |
| Pneumothorax with or without indwelling catheter | 512.1 | J95.811 | 32554 | 34.04 | 0W9930Z |
| 512 | J93.11 | 32555 | 34.06 | 0W9B30Z |
| 518 | J93.83 | 32551 | 34.09 | 0W9940Z |
|  | J93.9 |  | 34.01 | 0W9B40Z |
|  | J93.8 |  |  | 0BHQ3YZ |
|  |  |  |  | 0WP830Z |
| Prolonged air leak >5 days | 512.2 | J93.0 | 32554 | 34.04 | 0W9930Z |
|  | J93.82 | 32555 | 34.06 | 0W9B30Z |
|  | J95.812 | 32551 | 34.09 | 0W9940Z |
|  |  |  | 34.01 | 0W9B40Z |
|  |  |  |  | 0BHQ3YZ |
|  |  |  |  | 0WP830Z |
| Hemorrhage | 459.0 | R58 | 36430 | 99.04 | 30233N1 |
| 285.1 | D62 |  |  | 30233P1 |
| 998.11 | J95.830 |  |  |  |
| 998.2 | J95.831 |  |  |  |
| 998.12 | J95.71 |  |  |  |
| 786.30 | J95.62 |  |  |  |
|  | R04.2 |  |  |  |
|  | R04.9 |  |  |  |
| Post treatment change in clinical status to intubated / mechanical ventilation | 518.51 | J95.821 | 31500 | 96.04 | 0BH17EZ |
| 518.53 | J96.00 | 94002 | 96.71 | 5A1935Z |
| 518.81 | J95.822 | 94003 | 96.72 | 5A1945Z |
|  | J96.20 |  |  | 5A1955Z |
|  | J96.00 |  |  |  |
| Mediastinitis | 519.2 | J98.51 | 96365 | 99.21 | 3E03329 |
| 998.59 | T81.4XXA | 49405 | 34.1 | 0W9C00Z |
| 998.89 | T81.89XA |  |  | 0W9C30Z |
|  |  |  |  | 0W9C40Z |
|  |  |  |  | 0W9C0ZZ |
|  |  |  |  | 0W9C3ZZ |
|  |  |  |  | 0W9C4ZZ |
| Pneumonia | 486 | J18.8 | 96365 | 99.21 | 3E03329 |
|  | J18.9 |  |  |  |
| Empyema | 510.0 | J86.0 | 96365 | 99.21 | 3E03329 |
| 510.9 | J86.9 | 32554 | 34.04 | 0W9930Z |
|  |  | 32555 | 34.06 | 0W9B30Z |
|  |  | 32551 | 34.09 | 0BHQ3YZ |
|  |  | 49405 | 34.1 | 0W9940Z |
|  |  | 32225 | 34.51 | 0W9B40Z |
|  |  | 32651 | 34.52 | 0WP830Z |
|  |  | 32320 | 34.01 | 0W9C00Z |
|  |  | 32220 |  | 0W9C30Z |
|  |  | 32652 |  | 0W9C40Z |
|  |  |  |  | 0W9C0ZZ |
|  |  |  |  | 0W9C3ZZ |
|  |  |  |  | 0W9C4ZZ |
|  |  |  |  | 0BDN0ZZ |
|  |  |  |  | 0BDP0ZZ |
|  |  |  |  | 0BDN4ZZ |
|  |  |  |  | 0BDP4ZZ |
| Abscess of lung | 513.0 | J85.0 | 96365 | 99.21 | 3E03329 |
|  | J85.1 |  |  |  |
|  | J85.2 |  |  |  |

**Day of procedure for inpatient biopsies. Procedures performed after day 2 are considered to be incidental to the primary reason for admission and therefore costed at the rate of the same procedure performed on an outpatient basis.**


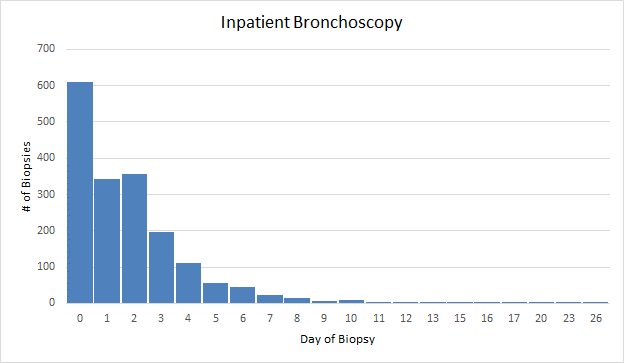


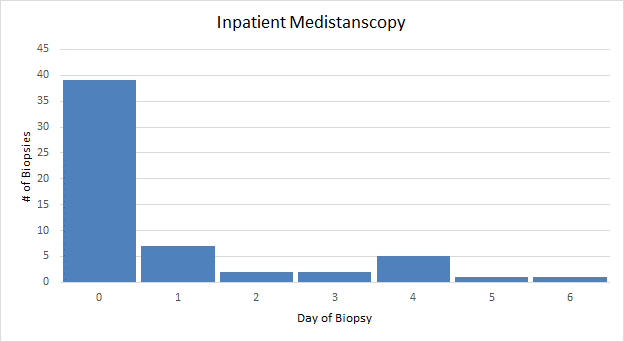

Supplement: Supplementary file 1 [file get_supplementary_file.php]
